## RESEARCH ARTICLE

# Archaeal community variation in the Qinhuangdao coastal aquaculture zone revealed by high-throughput sequencing

Shuping Wang, Xin Zheng, Huijuan Xia, Di Shi, Juntao Fan, Pengyuan Wang, Zhenguang Yan \*

State Key Laboratory of Environmental Criteria and Risk Assessment, Chinese Research Academy of Environmental Sciences, Beijing, China

\* [zgyan@craes.org.cn](mailto:zgyan@craes.org.cn)

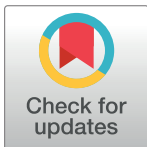

## OPEN ACCESS

**Citation:** Wang S, Zheng X, Xia H, Shi D, Fan J, Wang P, et al. (2019) Archaeal community variation in the Qinhuangdao coastal aquaculture zone revealed by high-throughput sequencing. PLoS ONE 14(6): e0218611. <https://doi.org/10.1371/journal.pone.0218611>

**Editor:** Yiguo Hong, CAS, CHINA

**Received:** April 23, 2019

**Accepted:** June 5, 2019

**Published:** June 21, 2019

**Copyright:** © 2019 Wang et al. This is an open access article distributed under the terms of the [Creative Commons Attribution License](https://creativecommons.org/licenses/by/4.0/), which permits unrestricted use, distribution, and reproduction in any medium, provided the original author and source are credited.

**Data Availability Statement:** The sequences of 16S rRNA gene reported in this study have been deposited in GenBank under the accession number PRJNA508582 for sediment and water samples.

**Funding:** ZY is supported by the Major Science and Technology Program for Water Pollution Control and Treatment under contract No. 2017ZX07301002-01. The funders had no role in study design, data collection and analysis, decision to publish, or preparation of the manuscript.

**Competing interests:** The authors have declared that no competing interests exist.

## Abstract

The differences in archaeal diversity and community composition in the sediments and waters of the Qinhuangdao coastal aquaculture zone were investigated. Furthermore, the associations between dominant archaeal taxa with geographic and environmental variables were evaluated. High-throughput sequencing of archaeal 16S rRNA genes yielded a total of 176,211 quality-filtered reads and 1,178 operational taxonomic units (OTUs) overall. The most abundant phylum and class among all communities were Thaumarchaeota and Nitrososphaeria, respectively. Beta diversity analysis indicated that community composition was divided into two groups according to the habitat type (i.e., sediments or waters). Only 9.8% OTUs were shared by communities from the two habitats, while 73.9% and 16.3% of the OTUs were unique to sediment or water communities, respectively. Furthermore, the relative abundances of the dominant OTUs differed with habitat type. Investigations of relationships between dominant OTUs and environmental variables indicated that some dominant OTUs were more sensitive to variation in environmental factors, which could be due to individual taxonomic differences in lifestyles and biological processes. Overall, the investigation of archaeal community variation within the Qinhuangdao coastal aquaculture zone provides an important baseline understanding of the microbial ecology in this important ecosystem.

## Introduction

The Bohai Sea has become one of the most polluted marine systems in China, and its ecosystem is rapidly degrading [1]. The city of Qinhuangdao is on the coast of the Bohai Sea and is well known for its seaside scenery and offshore mariculture industry [2,3]. The dominant mariculture practice in the Qinhuangdao coastal area is raft cultivation, with Bay scallops (*Argopecten irradians*) as the primary cultivated shellfish species. *A. irradians* farming has been conducted in Qinhuangdao for over 30 years, more than that, the scale of aquaculture expanded quickly after 2000 and now accounts for more than 70% of its production in China [4,5]. Seabeds below *A. irradians*' farms are usually enriched in organic materials, and these

benthic environments can exhibit pronounced variation in sediment geochemistry and benthic community structures [5]. Several studies have investigated the water quality, phytoplankton communities, and bacterial communities in Qinhuangdao coastal areas. However, similar studies have yet to be conducted for the Qinhuangdao coastal aquaculture zone [6–10]. A complete understanding of microbial diversity and abundances of aquaculture zones is crucial to understanding these ecosystems. Nevertheless, there is a lack of available data for microbial communities in the ecosystems of the Qinhuangdao coastal aquaculture zone.

Microbial communities and their associated metabolic activities in marine waters and sediments have profound impacts on global biogeochemical cycles, including those for nitrogen, carbon, and sulfur, in addition to impacting food webs [11,12]. Archaeal populations are typically considered to thrive in extreme environments, but represent small fractions of the total microbial communities in marine systems and are thus considered part of the rare biosphere in marine ecosystems [13]. Regardless, marine archaeal populations significantly impact global biogeochemical cycles and greenhouse gas emissions [14]. For example, ANME-1 and ANME-2 archaea in marine systems perform anaerobic oxidation of methane [15]. The oxidation of ammonia to nitrite can be performed by the phylum Thaumarchaeota which possess the ammonia monooxygenase subunit A (*amoA*) genes [16–18]. Therefore, understanding variation of archaeal communities in aquaculture environments is crucial for predicting biogeochemical fluxes in such environments.

The number of archaeal species known from environmental 16S rRNA gene sequences has far surpassed that of cultured archaea. Consequently, 16S rRNA gene high-throughput sequencing has been used to investigate the distribution of Archaea among various environments [19–21]. Investigations of microbial diversity in the Qinhuangdao coastal ecosystem have mainly focused on evaluating bacterial communities in waters and intertidal sediments [7,8,10]. In contrast, nothing is known of the archaeal community composition and diversity in Qinhuangdao coastal aquaculture environments.

Organic matter in sediments is  $10^4$ – $10^5$  fold higher than in waters and serves as an important energy source for microorganisms [13]. Indeed, the relative abundances of microbial taxa can be shaped by variation in organic carbon availability and mineralogy [22]. Archaea account for more than 20% of the bacterial and archaeal communities of ocean waters and dominate microbial communities in sediments [23,24]. The sediments and their corresponding benthic waters are heterogeneous and can also drive variation in microbial community composition. Specifically, geographic and environmental factors can exert selective pressures on the microbial communities. For example, adaptive shifts in bacterioplankton community composition and species interactions occurred in response to nutrient pollution in highly polluted water bodies [25]. Therefore, connecting archaeal distributions with habitat types and environmental variables will promote a better understanding of archaeal metabolic functions and biogeochemical processes within Bohai coastal aquaculture environments.

In this study, archaeal communities in waters and sediments were investigated at four stations in the Bohai coastal aquaculture zone using high-throughput Illumina sequencing of community 16S rRNA genes. The associations of archaeal taxa with habitat types in addition to geographic and environmental parameters were investigated. The main objectives of this study were to (1) compare differences in diversity among archaeal communities within sediments and waters of the aquaculture zone and (2) evaluate whether geographical or environmental variables influence the relative abundances of dominant archaeal taxa in the coastal waters. This study represents the first report of archaeal diversity, community composition, and the role of external factors influencing archaeal diversity within ecosystems of the Qinhuangdao coastal aquaculture zone.

## Materials and methods

### Site description, sample collection, and physicochemical analyses

Raft cultures for scallop cultivation are primarily used in the study area and the farmed scallop primarily originate from the lower layer seawater. Ocean waters were collected on July 26, 2017 from four different sites that were located in the *A. irradians* farming area of the bay (Fig 1). S1 waters (39°36'53" N, 119°20'43" E) came from 8 m depth, S2 (39°34'43" N, 119°25'32" E) from 10 m depth, S3 (39°28'2" N, 119°30'43" E) from 13 m depth, and S4 (39°32'10" N, 119°30'18" E) from 15 m depth, which was the deepest point in the water column. In addition, benthic sediments were concomitantly collected at the S1 (39°36'53" N, 119°20'43" E) and S2 (39°34'43" N, 119°25'32" E) sites. Ten litres of seawater were collected in triplicate at each location, and the triplicate samples were homogeneously mixed prior to filtration. Five litres of pooled water from each site were filtered through a 0.2- $\mu$ m filter membrane (Millipore, Billerica, USA) and the filter membranes were then stored at -80°C until further analysis. Sediments were collected using a stainless steel static gravity corer (UWITEC, Mondsee, Austria). Five grams of surface sediments (0–5 cm) were carefully removed with a stainless steel spoon and stored in sterile 5 ml storage tubes. Samples were immediately preserved on dry ice after sampling, and then transported to the laboratory. Several water physicochemical parameters were measured with a portable YSI Pro Plus Multiparameter instrument (YSI, Yellow Springs, OH, USA) including water temperature, dissolved oxygen (DO), salinity, turbidity, electrical conductivity (EC), and total dissolved solids (TDS). Total nitrogen (TN), total phosphorus (TP), and total organic carbon (TOC) were also measured in water samples using the protocols described in "Specification for oceanographic survey" (GB/T 12763.4–2007).

### DNA isolation, PCR amplification, and high-throughput sequencing of 16S rRNA genes

Total community DNA was isolated directly from membrane samples using an E.Z.N.A.<sup>TM</sup> water DNA kit (Omega Bio-Tek Inc., USA), according to the manufacturer's protocols using an integrated mechanical and chemical extraction procedure. DNA was also extracted from 1 g of sediments using a PowerMax Soil DNA isolation Kit (12988–10, MOBIO Laboratories, Inc, Carlsbad, CA). Purified DNA was dissolved in 50  $\mu$ l of ddH<sub>2</sub>O and stored at -20°C. DNA quantity and quality were determined using agarose gel electrophoresis and spectrophotometric quantification using a NanoDrop ND 2000 instrument (Thermo Fisher Scientific, Waltham, MA, USA).

The hypervariable V4+V5 sequence region of archaeal 16S rRNA genes were amplified using the universal primers Arch519F (5' -CAGCCGCCGCGTAA-3') and Arch915R (5' -GTGCTCCCCCGCCAATTCCT-3') [26]. PCR amplification was conducted as previously described [27]. DNA sequencing of PCR amplicons was then performed on the Illumina Miseq platform using paired-end 250 bp sequencing and a V3 Miseq Reagent Kit at the Personal Biotechnology Company (Novogene, Tianjin, China).

### Data processing

Raw sequence reads were quality filtered in QIIME [28] using stringent specifications. Paired reads were merged using FLASH-1.2.8 [29]. Operational taxonomic units (OTUs) were then defined at the 97% nucleotide identity threshold with UCLUST, as implemented in QIIME [30]. Representative sequences from each OTU were then taxonomically classified with BLAST [31] searches against the SILVA v132 reference database using QIIME [32]. Singleton OTUs with only a single read were removed from the analysis. Archaeal community alpha

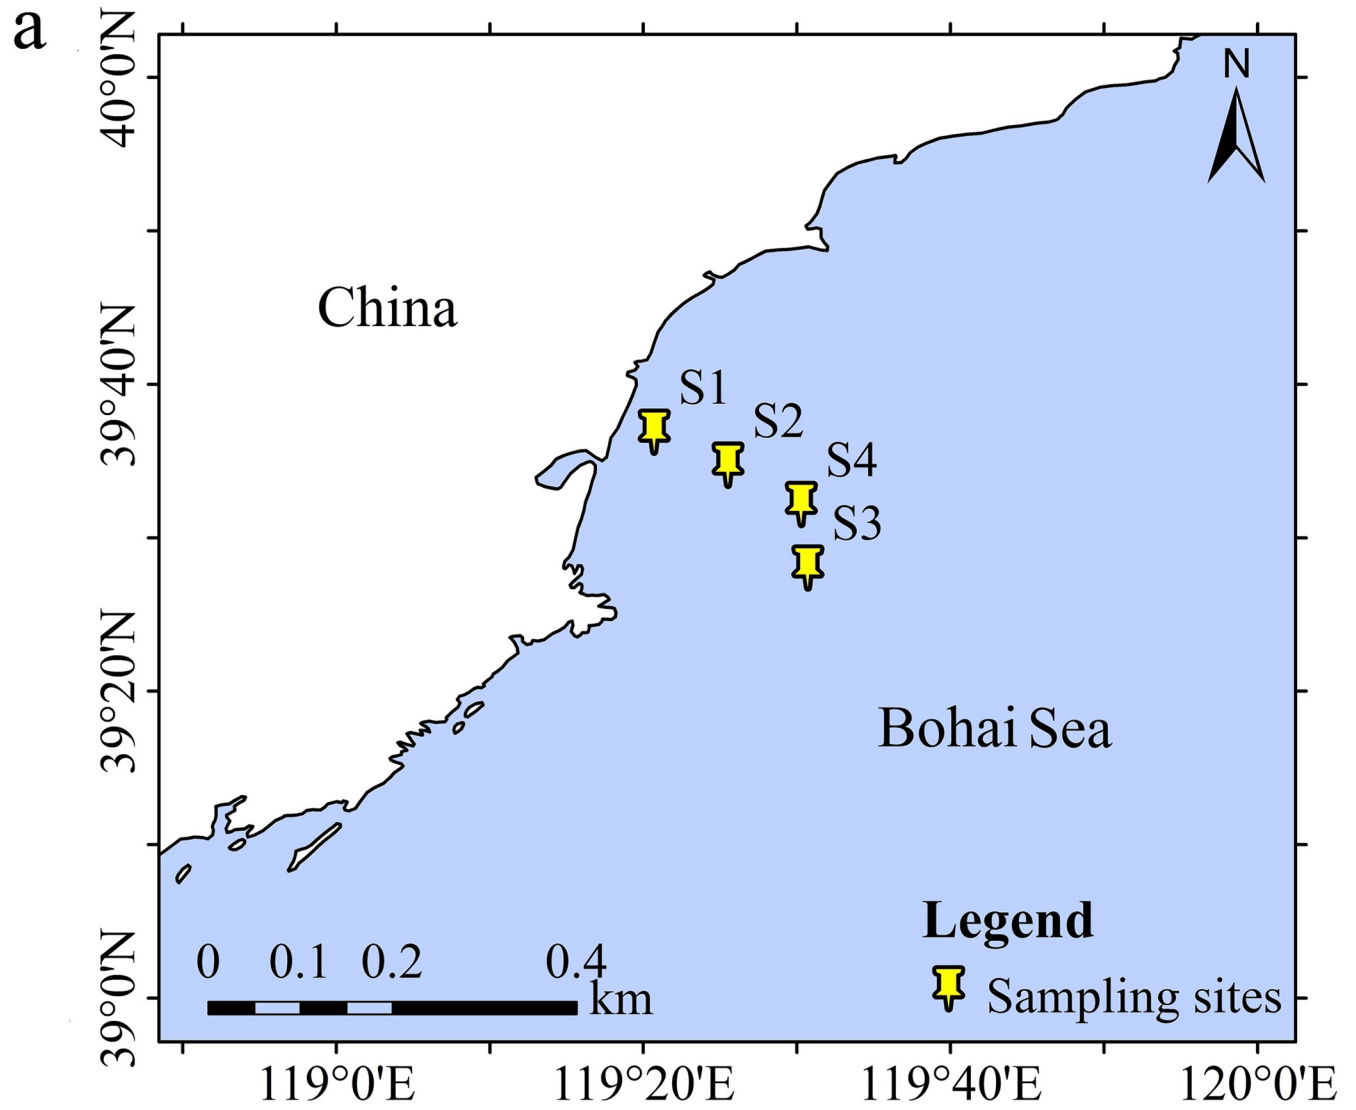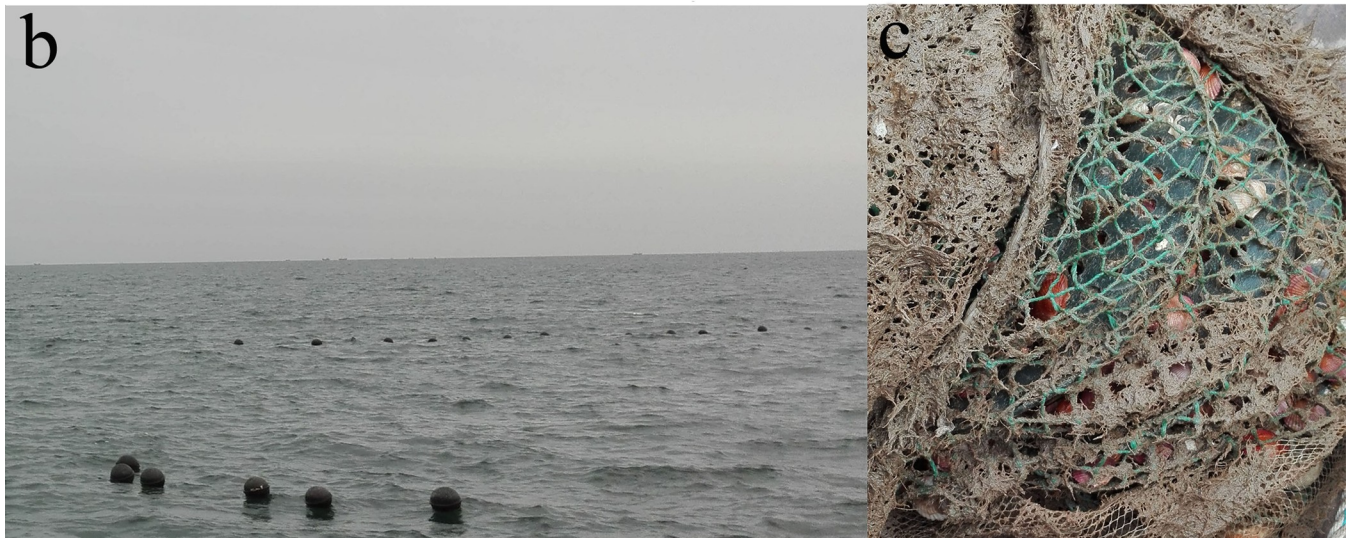

**Fig 1.** (a) A map showing sampling locations within the Qinhuangdao coastal aquaculture zone. ArcGIS 10.1 software (<http://www.esri.com/software/arcgis>) was used to develop the map. (b) Raft cultivation of *A. irradians* in the Qinhuangdao coastal aquaculture zone. (c) Mesh cage used for cultivation.

<https://doi.org/10.1371/journal.pone.0218611.g001>

diversity was then estimated using the Shannon diversity index. Community compositional similarity was also estimated using the Bray-Curtis distance metric. The alpha- and beta-diversity indices were both calculated using QIIME. In addition, rarefaction curves were generated using UPARSE to quantify the level of diversity that was captured with the sequencing efforts.

## Statistical analyses

The relative abundances of each taxonomic group were determined for each community, while excluding sequences annotated as Bacteria, Eukarya, and unclassifiable groups. The 16S rRNA gene sequences of the 50 most abundant archaeal OTUs were aligned using Clustal X [33]. A phylogenetic tree was then obtained from the alignment using maximum likelihood methods and 1,000 bootstrap replicates in the MEGA 6 software package [34]. Dominant OTUs were defined as the 50 most relatively abundant OTUs. Venn diagrams of OTU members shared among samples were constructed with an online tool (<http://www.omicshare.com/tools/Home/Soft/venn>). Heatmaps were also constructed to visualize among-sample diversity using R software packages (<http://cran.r-project.org/>, version 3.2.2). Spearman correlational analysis was conducted using the SPSS 17.0 software program (Chicago, IL, USA), with two-tailed *p* values less than 0.01 considered as statistically significant.

## Nucleotide sequence accession numbers

16S rRNA gene sequences generated in this study are deposited in GenBank under the accession number PRJNA508582.

## Results

### Rarefaction curve analysis and taxonomic classifications

A total of 447,217 16S rRNA gene sequences ( $74,536 \pm 12,591$  reads [mean  $\pm$  standard deviation]) were obtained from sediment and water samples after quality-filtering raw read sequences. A total of 1,178 OTUs were observed overall among the archaeal communities. Rarefaction curves for each sample reached asymptotes, indicating that native archaeal diversity was well covered with sufficient sequencing depth (Fig 2A). A total of 871, 199, 75, 94, 148, and 71 OTUs were observed in the S1 sediment, S2 sediment and the S1, S2, S3, and S4 water samples, respectively (Fig 2B).

### Community compositional variation

To investigate the taxonomic composition of archaeal communities, OTUs were classified at the phylum- and class levels (Fig 3). OTUs that could not be assigned to any phylum or class are indicated as 'others'. Seven major archaeal phyla were identified in the sediment and water communities, including Thaumarchaeota, Nanoarchaeaeota, Crenarchaeota, Euryarchaeota, Asgardaeota, Altiarchaeota, and Diapherotrites (Fig 3A). A majority of the archaeal 16S rRNA gene sequences were associated with the Thaumarchaeota and Nanoarchaeaeota phyla, which represented 70.7%-95.6% and 4.1%-24.3% of the total sequences, respectively. The remaining six phyla (inclusive of 'others') accounted for only 2.7%-4.2% of the communities overall. At the class level, OTUs comprised 13 archaeal classes, with the most abundant corresponding to Nitrososphaeria (70.7%-95.6%). Woesearchaeia were also abundant in all of the samples,



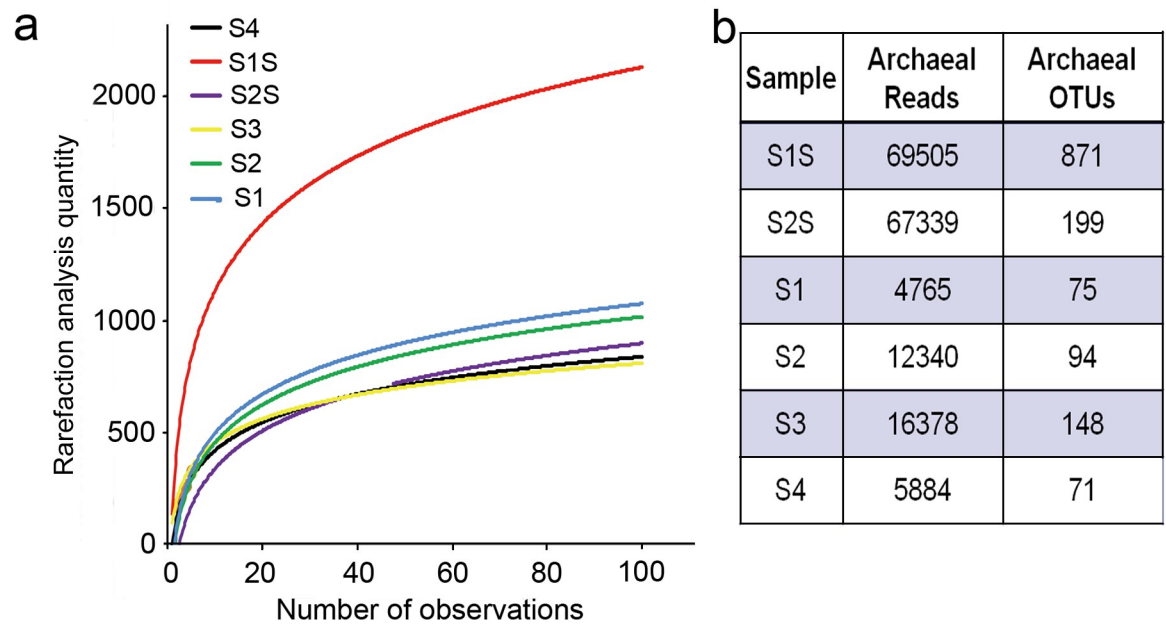

**Fig 2. 16S rRNA gene sequence diversity summary and taxonomic assignments.** (a) Rarefaction curves of OTU richness for archaeal communities. (b) Information for archaeal sequences from different samples.

<https://doi.org/10.1371/journal.pone.0218611.g002>

representing 4.1%–24.3% of the community compositions (Fig 3B). The Altiarchaeota and Diapherotrites phyla were only present as minor archaeal community members. In addition, the Altiarchaeota and Diapherotrites were only found in the sediment communities (Fig 3A).

### Archaeal diversity differs between sediments and waters

Shannon indices of sediment communities were slightly higher than those of waters, but were not significantly different ( $p > 0.05$ ; Fig 4A). Cluster analysis of beta diversity indicated that the archaeal communities of sediments were significantly different than those of the water communities (Fig 4B). Taken together, these results indicate that the archaeal communities differed between sediments and waters.

### Shared and unique OTUs between sediments and waters

A total of 116 OTUs were shared between sediment and water communities, while 870 and 192 OTUs were unique to each of the habitats, respectively (Fig 5). Most of the dominant OTUs in either habitat were shared amongst both habitats. For example, OTU932, OTU3223, and OTU371, which were all classified as *Candidatus Nitrosopumilus*, were the most abundant shared OTUs. OTU3191, which was also classified as *Candidatus Nitrosopumilus*, was the most abundant OTU in sediments not observed in water samples. Conversely, OTU67 (classified as Nitrososphaeraceae), OTU2438 (*Candidatus Nitrosopumilus*), and OTU326 (Marine Group II) were the three most abundant OTUs that were only found in water communities (Table 1).

### Turnover of dominant OTUs is associated with different habitat types

A phylogenetic analysis was conducted using aligned 16S rRNA gene sequences from the 50 most abundant OTUs (Fig 6). The phylogenetic analysis indicated that these 50 OTUs could

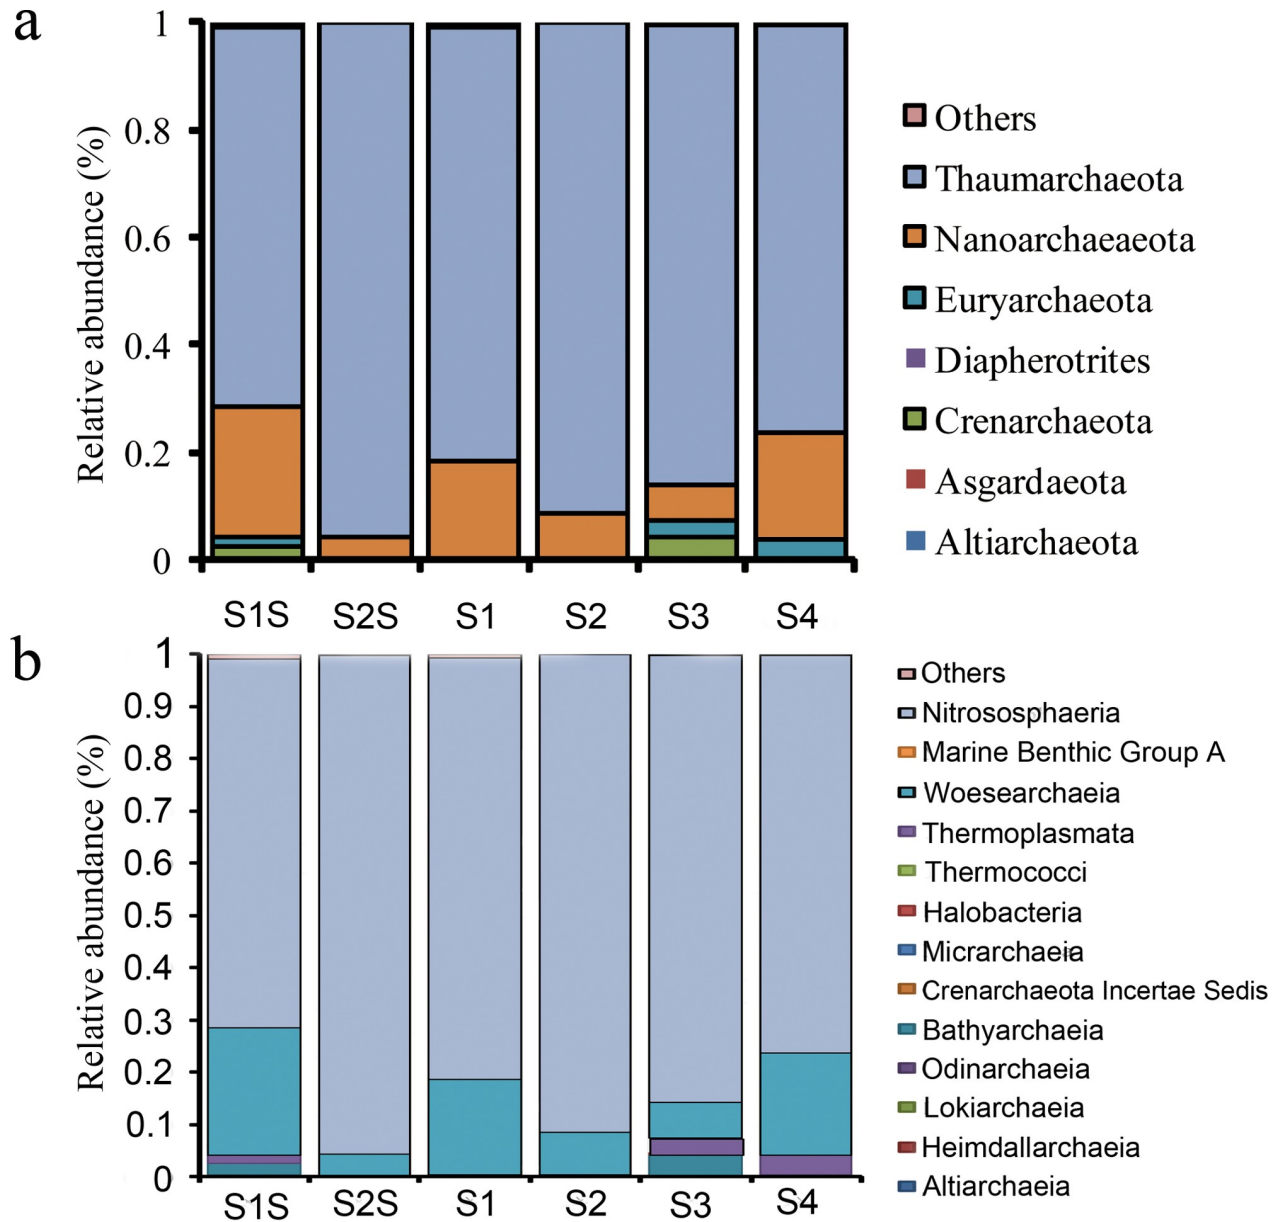

**Fig 3.** Taxonomic profiles of archaeal communities at the (a) phylum and (b) class levels. Taxonomic groups with low abundances are indicated as “others”.

<https://doi.org/10.1371/journal.pone.0218611.g003>

be categorized into four groups corresponding to the classes Nitrososphaeria, Bathyarchaeia, Thermoplasmata, and Woesearchaeia. The distributions of the relative abundances of these OTUs among communities were also explored. Most OTUs, and especially OTU1762, OTU829, OTU932, OTU371, OTU3223, OTU1930, OTU281, and OTU3559, were more abundant in sediments than in waters (Fig 6). In contrast, only six OTUs including OTU2438, OTU67, OTU3503, OTU353, OTU896, and OTU1433 were more abundant in water communities than in those of sediments.

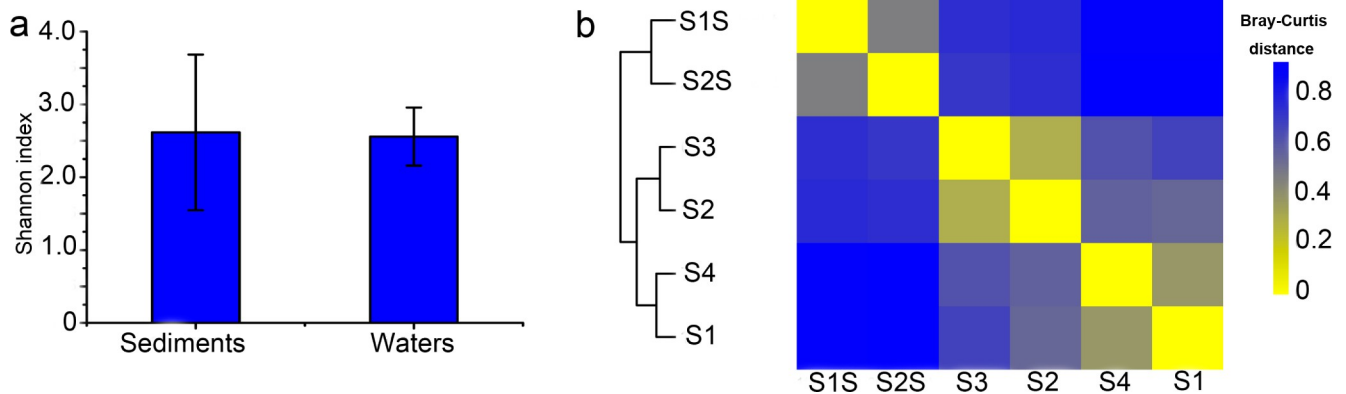

**Fig 4. Summary of archaeal community variation between sediments and waters.** (a) Shannon diversity index values for archaeal communities. (b) Comparison of archaeal community compositions using Bray-Curtis distances.

<https://doi.org/10.1371/journal.pone.0218611.g004>

### Associations between dominant OTUs with geographic or environmental variables

Taxonomic responses to varying geographic or environmental factors commonly differ. Archaeal OTU richness and Shannon diversity index values for the Bohai bay communities did not correlate with measured geographic or environmental variables ( $p > 0.05$ ). Spearman correlation analyses were used to further explore the relationships between the abundances of dominant OTUs with geographic and environmental parameters (Fig 7). Most of the dominant archaeal OTUs were not significantly associated with any of the geographic or environmental variables that were measured. Nevertheless, the abundances of eleven dominant archaeal OTUs variably correlated with latitude, longitude, depth, temperature, DO, salinity, turbidity, EC, TDS, or TOC. Specifically, the abundances of OTU3223 (*Candidatus Nitrosopumilus*) and OTU1189 (*Woesearchaeia*) were negatively associated with latitude ( $p < 0.01$ ). The relative abundances of OTU371 (*Candidatus Nitrosopumilus*) and OTU3559 (*Candidatus*

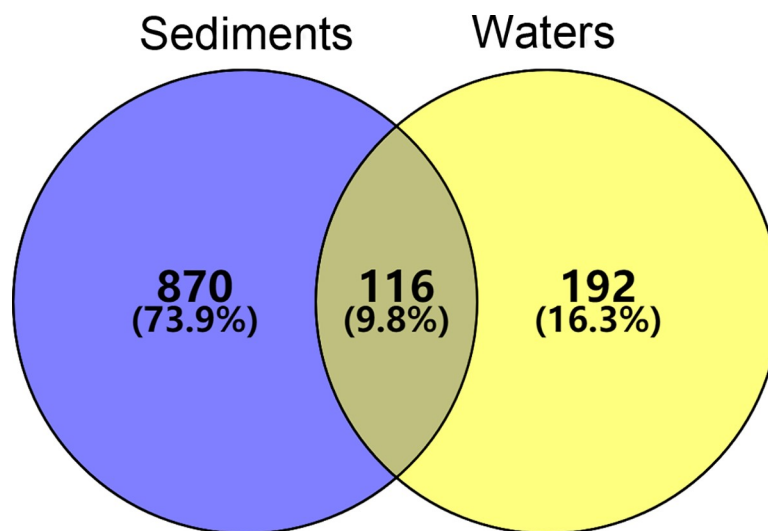

**Fig 5. Venn diagrams showing the distribution of unique and shared OTUs between habitats.** The numbers and relative proportions of OTUs in each sample are indicated by their respective circles.

<https://doi.org/10.1371/journal.pone.0218611.g005>



**Table 1. The 50 most abundant OTUs and their taxonomic affiliations.**

| Feature ID | Taxon                                                                                                                      |
|------------|----------------------------------------------------------------------------------------------------------------------------|
| OTU932     | Thaumarchaeota;Nitrososphaeria;Nitrosopumilales;Nitrosopumilaceae;Candidatus <i>Nitrosopumilus</i>                         |
| OTU3223    | Thaumarchaeota;Nitrososphaeria;Nitrosopumilales;Nitrosopumilaceae;Candidatus <i>Nitrosopumilus</i>                         |
| OTU371     | Thaumarchaeota;Nitrososphaeria;Nitrosopumilales;Nitrosopumilaceae;Candidatus <i>Nitrosopumilus</i>                         |
| OTU1762    | Thaumarchaeota;Nitrososphaeria;Nitrosopumilales;Nitrosopumilaceae;Candidatus <i>Nitrosopumilus</i>                         |
| OTU1930    | Thaumarchaeota;Nitrososphaeria;Nitrosopumilales;Nitrosopumilaceae                                                          |
| OTU829     | Thaumarchaeota;Nitrososphaeria;Nitrosopumilales;Nitrosopumilaceae;Candidatus <i>Nitrosopumilus</i>                         |
| OTU249     | Thaumarchaeota;Nitrososphaeria;Nitrosopumilales;Nitrosopumilaceae;Candidatus <i>Nitrosopumilus</i>                         |
| OTU2466    | Thaumarchaeota;Nitrososphaeria;Nitrosopumilales;Nitrosopumilaceae;Candidatus <i>Nitrosopumilus</i>                         |
| OTU281     | Thaumarchaeota;Nitrososphaeria;Nitrosopumilales;Nitrosopumilaceae                                                          |
| OTU1250    | Thaumarchaeota;Nitrososphaeria;Nitrosopumilales;Nitrosopumilaceae                                                          |
| OTU3559    | Thaumarchaeota;Nitrososphaeria;Nitrosopumilales;Nitrosopumilaceae;Candidatus <i>Nitrosopelagicus</i> ; uncultured archaeon |
| OTU3455    | Thaumarchaeota;Nitrososphaeria;Nitrosopumilales;Nitrosopumilaceae                                                          |
| OTU1356    | Thaumarchaeota;Nitrososphaeria;Nitrosopumilales;Nitrosopumilaceae;Candidatus <i>Nitrosopelagicus</i> ; uncultured archaeon |
| OTU984     | Thaumarchaeota;Nitrososphaeria;Nitrosopumilales;Nitrosopumilaceae;Candidatus <i>Nitrosopumilus</i>                         |
| OTU1887    | Thaumarchaeota;Nitrososphaeria;Nitrosopumilales;Nitrosopumilaceae;Candidatus <i>Nitrosopumilus</i> ; uncultured archaeon   |
| OTU954     | Thaumarchaeota;Nitrososphaeria;Nitrosopumilales;Nitrosopumilaceae                                                          |
| OTU3191    | Thaumarchaeota;Nitrososphaeria;Nitrosopumilales;Nitrosopumilaceae;Candidatus <i>Nitrosopumilus</i>                         |
| OTU770     | Thaumarchaeota;Nitrososphaeria;Nitrosopumilales;Nitrosopumilaceae;Candidatus <i>Nitrosopelagicus</i> ; uncultured archaeon |
| OTU3181    | Thaumarchaeota;Nitrososphaeria;Nitrosopumilales;Nitrosopumilaceae; <i>Cenarchaeum</i> ; uncultured archaeon                |
| OTU1400    | Thaumarchaeota;Nitrososphaeria;Nitrosopumilales;Nitrosopumilaceae;Candidatus <i>Nitrosopumilus</i> ; uncultured archaeon   |
| OTU2462    | Nanoarchaeaeota;Woesearchaeia;uncultured bacterium                                                                         |
| OTU1071    | Thaumarchaeota;Nitrososphaeria;Nitrosopumilales;Nitrosopumilaceae;Candidatus <i>Nitrosopumilus</i> ; uncultured archaeon   |
| OTU3289    | Thaumarchaeota;Nitrososphaeria;Nitrosopumilales;Nitrosopumilaceae                                                          |
| OTU1158    | Nanoarchaeaeota;Woesearchaeia;uncultured bacterium                                                                         |
| OTU853     | Thaumarchaeota;Nitrososphaeria;Nitrosopumilales;Nitrosopumilaceae;Candidatus <i>Nitrosopumilus</i>                         |
| OTU896     | Euryarchaeota;Thermoplasmata;Marine Group II;marine metagenome                                                             |
| OTU1433    | Nanoarchaeaeota;Woesearchaeia;uncultured bacterium                                                                         |
| OTU927     | Thaumarchaeota;Nitrososphaeria;Nitrosopumilales;Nitrosopumilaceae;Candidatus <i>Nitrosopumilus</i> ; uncultured archaeon   |
| OTU1592    | Thaumarchaeota;Nitrososphaeria;Nitrosopumilales;Nitrosopumilaceae                                                          |
| OTU67      | Thaumarchaeota;Nitrososphaeria;Nitrososphaerales;Nitrososphaeraceae                                                        |
| OTU2990    | Nanoarchaeaeota;Woesearchaeia                                                                                              |
| OTU2132    | Crenarchaeota;Bathyarchaeia;uncultured crenarchaeote                                                                       |
| OTU2041    | Thaumarchaeota;Nitrososphaeria;Nitrosopumilales;Nitrosopumilaceae                                                          |
| OTU3461    | Thaumarchaeota;Nitrososphaeria;Nitrosopumilales;Nitrosopumilaceae;Candidatus <i>Nitrosopelagicus</i> ; uncultured archaeon |
| OTU1810    | Nanoarchaeaeota;Woesearchaeia;uncultured bacterium                                                                         |
| OTU173     | Thaumarchaeota;Nitrososphaeria;Nitrosopumilales;Nitrosopumilaceae;Candidatus <i>Nitrosopumilus</i>                         |
| OTU1077    | Thaumarchaeota;Nitrososphaeria;Nitrosopumilales;Nitrosopumilaceae;Candidatus <i>Nitrosopumilus</i>                         |
| OTU90      | Nanoarchaeaeota;Woesearchaeia                                                                                              |
| OTU3457    | Nanoarchaeaeota;Woesearchaeia                                                                                              |

(Continued)

Table 1. (Continued)

| Feature ID | Taxon                                                                                                                    |
|------------|--------------------------------------------------------------------------------------------------------------------------|
| OTU1103    | Thaumarchaeota;Nitrososphaeria;Nitrosopumilales;Nitrosopumilaceae;Candidatus <i>Nitrosopumilus</i> ; uncultured archaeon |
| OTU2907    | Thaumarchaeota;Nitrososphaeria;Nitrosopumilales;Nitrosopumilaceae;Candidatus <i>Nitrosopumilus</i>                       |
| OTU353     | Crenarchaeota;Bathyarchaeia;uncultured <i>crenarchaeote</i>                                                              |
| OTU2438    | Thaumarchaeota;Nitrososphaeria;Nitrosopumilales;Nitrosopumilaceae;Candidatus <i>Nitrosopumilus</i>                       |
| OTU306     | Thaumarchaeota;Nitrososphaeria;Nitrosopumilales;Nitrosopumilaceae;Candidatus <i>Nitrosopumilus</i>                       |
| OTU1453    | <i>Thaumarchaeota</i> ;Nitrososphaeria;Nitrosopumilales;Nitrosopumilaceae;Cenarchaeum;uncultured archaeon                |
| OTU1189    | Nanoarchaeaeota;Woeseearchaeia                                                                                           |
| OTU2890    | Nanoarchaeaeota;Woeseearchaeia;uncultured bacterium                                                                      |
| OTU3503    | Thaumarchaeota;Nitrososphaeria;Nitrososphaerales;Nitrososphaeraceae                                                      |
| OTU886     | Thaumarchaeota;Nitrososphaeria;Nitrosopumilales;Nitrosopumilaceae                                                        |
| OTU1345    | Euryarchaeota;Thermoplasmata;SG8-5;uncultured archaeon                                                                   |

<https://doi.org/10.1371/journal.pone.0218611.t001>

*Nitrosopelagicus*) were significantly and negatively correlated with longitude ( $p < 0.01$ ), while those of OTU896 (Marine Group II) were strongly and positively correlated with longitude ( $p < 0.01$ ). In addition, the abundances of OTU249 (Candidatus *Nitrosopumilus*) and OTU1433 (Woeseearchaeia) were significantly and positively correlated with depth ( $p < 0.01$ ). The abundances of OTU3223 were negatively correlated with temperature, but positively correlated to DO ( $p < 0.01$ ). In contrast, the abundances of OTU1189 were negatively correlated with both temperature and DO ( $p < 0.01$ ). The abundances of OTU1762 (Candidatus *Nitrosopumilus*), OTU3455 (Nitrosopumilaceae) and OTU90 (Woeseearchaeia) were all significantly and negatively associated with salinity ( $p < 0.01$ ). The abundances of OTU3233 were significantly and positively correlated with turbidity ( $p < 0.01$ ), while those of OTU1189 were negatively associated with turbidity ( $p < 0.01$ ). The abundances of OTU249 and OTU1433 were significantly and positively correlated with EC and TDS ( $p < 0.01$ ). In contrast to the above, no significant associations were observed between the abundances of dominant OTUs and TN or TP ( $p > 0.05$ ). Lastly, the abundances of OTU932 (Candidatus *Nitrosopumilus*) were notably and negatively correlated with total organic carbon concentrations (TOC,  $p < 0.01$ ).

## Discussion

Microorganisms play important roles in mediating global biogeochemical cycling of essential elements in marine environments [35,36]. Among microbial groups, Archaea are ubiquitously and abundantly distributed in various marine environments, including marine sediments [37,38], coastal waters [39], estuaries [40], and mangrove sediments [41]. Archaea are key mediators of nitrification, sulfur cycling, methane oxidation, and methanogenesis within ocean environments [42–45]. However, the distribution of archaeal diversity and abundances in coastal aquaculture environments and their relationship with external influencing factors remain poorly understood. To fill this knowledge gap, archaeal 16S rRNA gene sequences were generated from communities within an aquaculture ecosystem using high-throughput sequencing methods and then taxonomically classified. The abundance of sequences affiliated with unclassified taxa increased when evaluated from the class to the species level, indicating substantial potential for archaeal biodiversity discovery. Among the communities analysed here, Thaumarchaeota and Nanoarchaeaeota accounted for 83.5% and 13.5% of the total communities, respectively. At a finer taxonomic level, the Nitrososphaeria and Woeseearchaeia

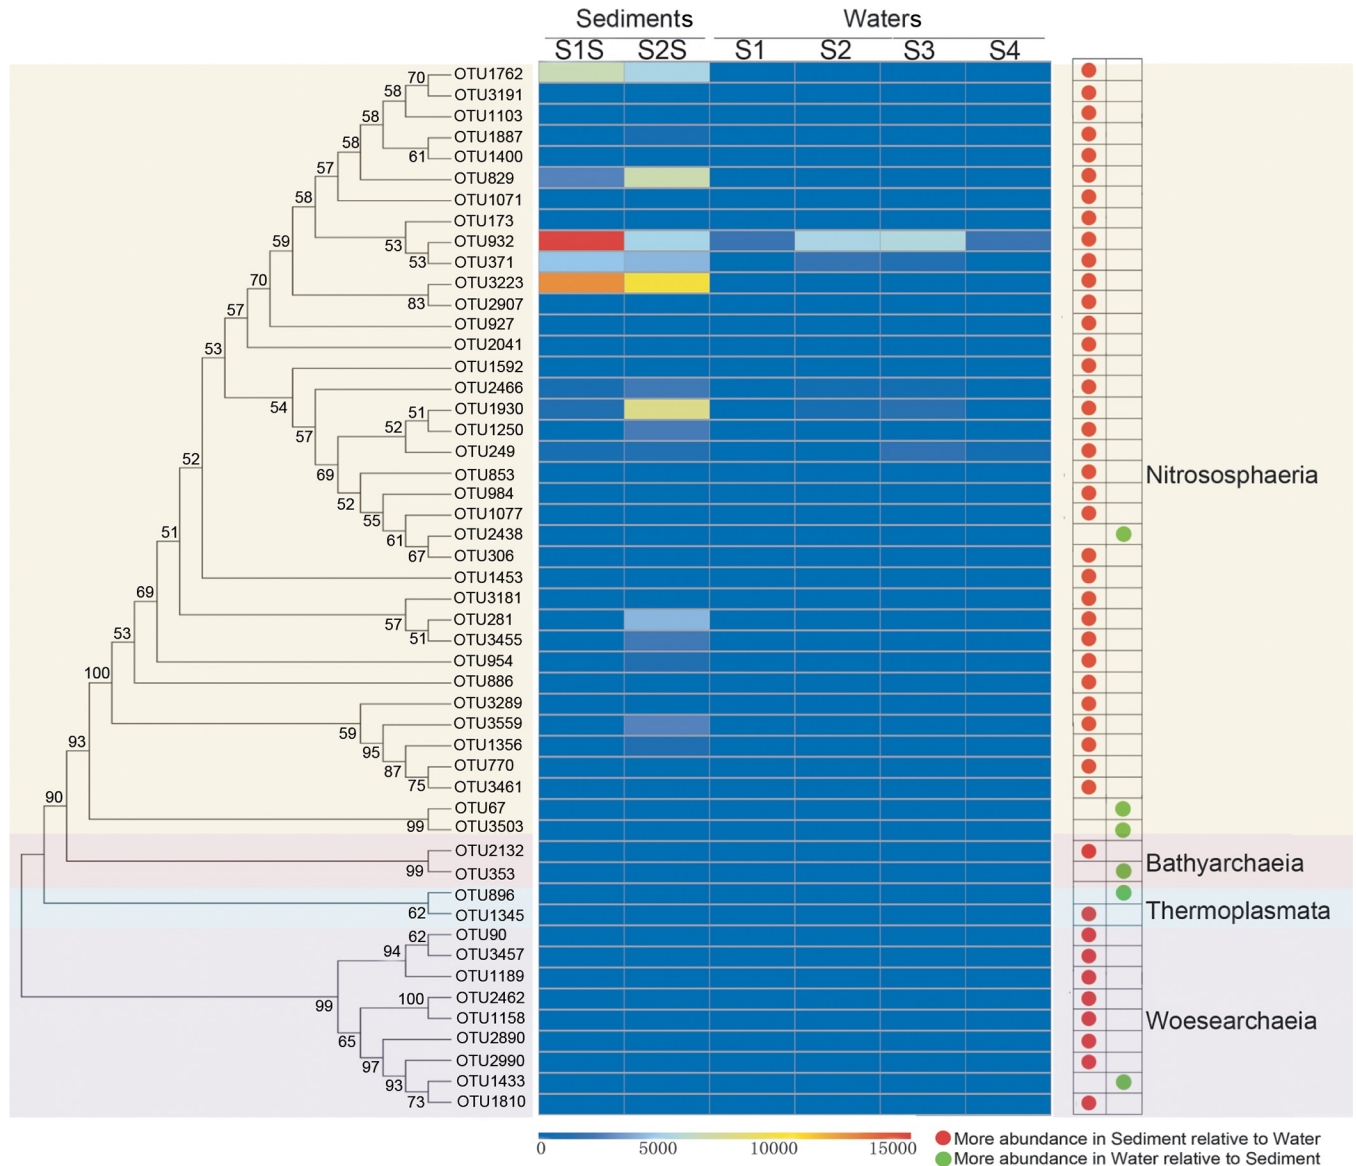

**Fig 6. Maximum likelihood phylogenetic tree and distribution of dominant archaeal OTUs in marine sediments and waters of the Qinhuangdao coastal aquaculture zone.** Only bootstrap values greater than 50% out of 1,000 replicates are shown. The relative abundances of OTUs are colored according to the corresponding heatmap legends.

<https://doi.org/10.1371/journal.pone.0218611.g006>

were the most abundant classes and accounted for 83.5% and 13.5% of the total archaeal communities, respectively.

Thaumarchaeota are ubiquitously distributed among a variety of environments, including soils, sediments, oceans, and freshwaters, and are one of the most abundant archaeal groups involved in environmental ammonia oxidation [46–51]. In particular, species within the Nitrososphaeria class of Thaumarchaeota perform ammonia oxidation, and their discovery has dramatically changed our perception of microbial nitrification and nitrogen cycling [16,17,52]. At a genus level, archaeal communities were dominated by *Candidatus Nitrosopumilus* (Thaumarchaeota) and high relative abundances of *Nitrosopumilus* were also observed in studies on archaeal communities in the Mediterranean Sea and Pacific deep-sea sediments[53,54]. In

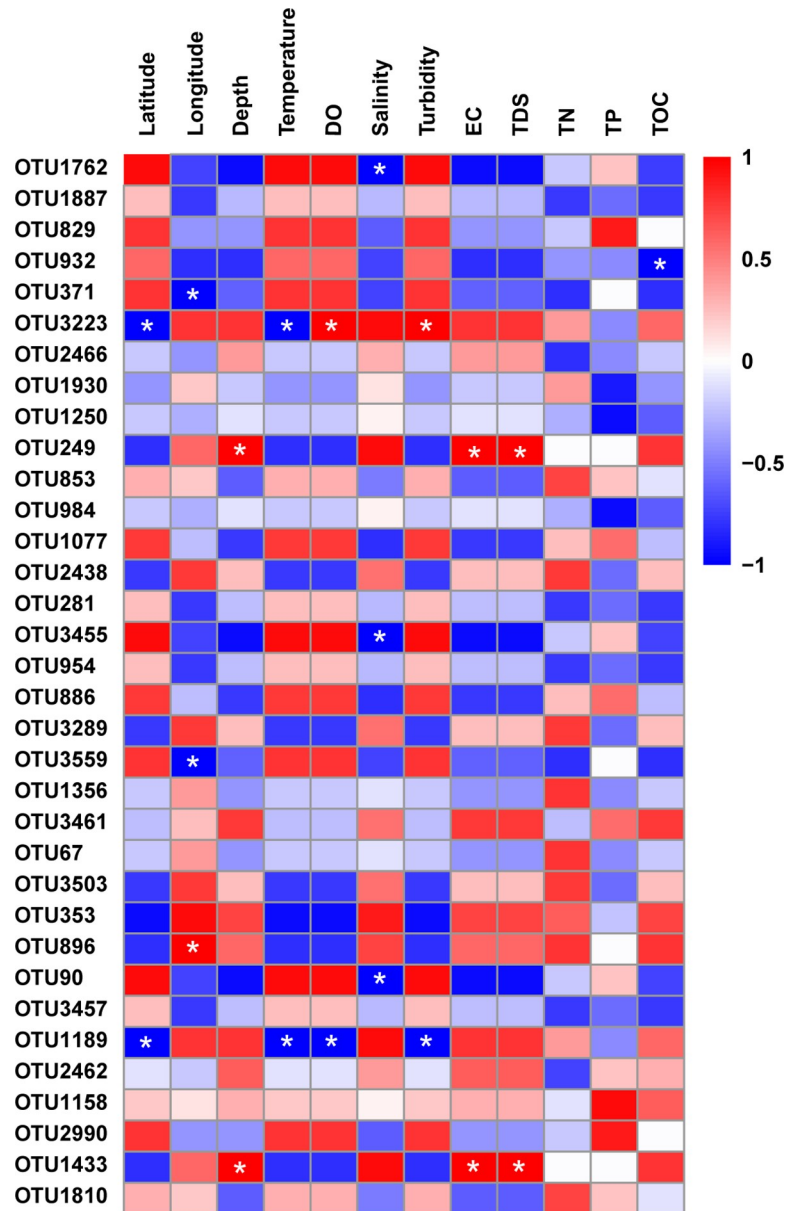

**Fig 7. Spearman's correlations between the abundances of dominant OTUs with geographic and environmental parameters.** Correlation coefficient values are colored according to their magnitude as indicated by the heatmap legends. Only taxa that were significantly correlated with one of the parameters are shown. \* indicates statistically significant values ( $p \leq 0.01$ ).

<https://doi.org/10.1371/journal.pone.0218611.g007>

contrast, Woese archaea live in terrestrial environments and exhibit fermentative and symbiotic lifestyles [55]. The sequences assigned to the Nanoarchaeota phylum from our samples were all affiliated with the Woese archaea. The specific lifestyles exhibited by these organisms could play a significant role in their adaptation to terrestrial and aquatic environments. Interestingly, Thermoplasmata were present in both the sediments and waters analysed here, suggesting their potential role in methanogenic activities in the Qinhuangdao coastal aquaculture zone. In addition, Altiarchaeota and Diapherotrite were only detected in sediments. The uncultivated archaeal group Altiarchaeota are a newly recognized phylum and are potentially

one of the most abundant autotrophic taxa within Earth's crust [56]. In addition, the Diapherotrites have only been detected in a few environments, including forest soils, lagoon sediments, and microbial mats [57]. The Diapherotrites contribute to carbon and hydrogen [biogeochemical cycles](#) and likely exhibit symbiotic and/or fermentative-based lifestyles [58]. Taken together, our results indicate that the complex archaeal communities of the Qinhuangdao coastal aquaculture zone might be involved in diverse metabolic processes including carbon and nitrogen cycling.

Microbial populations exhibiting high abundances can exert great influences on the overall structure and ecological function of microbial communities. Therefore, shifts in the relative abundances of predominant microorganisms under different environmental conditions can reflect adaptations of microbial populations to habitat filters. For example, previous research has suggested that ecological niche diversification within benthic microbial communities occurs at the millimetre scale [59–61]. Prior to this study, little was known about the distribution of archaeal populations among sediment and water habitats in the coastal environment of Qinhuangdao. Comparisons of community alpha and beta diversity differentiated communities between the sediments and waters. The two habitat types likely exhibited different archaeal diversities due to the intrinsic features of the ecosystems, which provide specialized niches for the adaptation of unique archaeal populations to either system [62,63]. Our results indicated significant archaeal species (i.e., proxied by OTUs) turnover between habitats. Specifically, the sediment communities generally comprised more OTUs than did those of the waters, suggesting the presence of more complex archaeal communities in the sediments. The greater OTU richness in sediments could be explained by the anoxic conditions of sediments, allowing archaeal growth by fermentation or anaerobic respiration using various electron acceptors [64].

The different habitat types also appeared to significantly influence the abundance of dominant OTUs. For example, the ammonia-oxidizing genus *Candidatus Nitrosopumilus* within the Thaumarchaeota phylum were found in all samples, and especially those from the sediments. These results indicate the possibility of ubiquitous ammonia oxidation in the coastal aquaculture zone, and especially in the sediments. Relatively high abundances of MGII were also observed in the waters, which could be due to their potential roles in metabolising organic matter and other taxa-specific energy requirements [65,66].

There is little information available regarding the occurrence of archaeal populations and environmental parameters. Our results indicate that the influence of geographical and environmental variables on the distribution of dominant taxa should be considered. Latitude has previously been implicated as one of the major factors affecting the distribution of archaeal communities in estuarine ecosystems [67]. Here, some dominant OTUs including OTU3223 and OTU1189 were negatively associated with latitude. Notably, longitude was also positively or negatively associated with the abundances of some dominant OTUs. Previous investigations have indicated that microbial community structures are strongly affected by spatial distances and water depth [68]. For example, Flavobacteria clades exhibit distinct distributional patterns corresponding to variation in depth [69]. Likewise, the influence of water depth was also observed for some dominant archaeal OTUs of our study.

Salinity and temperature are parameters that naturally vary, while nutrient concentrations and DO levels can indicate the extent of anthropogenic activities and their influence [8]. Environmental conditions can determine community composition within specific habitats, and understanding associations between taxa and environmental conditions can elucidate the exact response of individual taxa to environmental changes. Previous studies have indicated that archaeal taxa are less responsive to environmental factors than are bacterial taxa [70]. Our results revealed that some dominant OTUs were significantly associated with important



environmental variables, including temperature, DO, salinity, turbidity, EC, TDS, and TOC. Könneke *et al.* [71] reported that *Nitrosopumilus maritimus* was inhibited by organic substrates, even at very low concentrations. Interestingly, OTU932, which was classified as *Candidatus Nitrosopumilus*, was negatively correlated to TOC concentrations, which warrants further investigation. The negative correlations between OTU3223 and OTU1189 with temperature could be explained by their adaptation to cold environments [72]. Nevertheless, most OTUs associated with the Nitrososphaeria, Bathyarchaeia, Thermoplasmata, and Woesearchaeia did not exhibit any clear association with environmental factors and were invariably abundant among water samples. Taken together, these results suggest that the differential responses of archaeal taxa to environmental factors could be explained by distinct properties of individual taxa and because some OTUs could be more sensitive to variation in major environmental parameters.

## Conclusions

This study provides the first description of archaeal diversity and community composition in the sediments and waters of the Qinhuangdao coastal aquaculture zone. Our results predict that the archaeal communities could be involved in nitrogen and carbon cycling activities within the aquaculture zone. Habitat type (i.e., sediments and waters) significantly influenced the distribution of archaeal diversity and abundances of dominant OTUs within the coastal ecosystem. Furthermore, the influence of environmental factors on the distributions of dominant taxa suggested that dominant archaea were sensitive to environmental parameters, which might be due to their distinct lifestyles and biological processes. Additional investigations of functional gene expression and evaluation of the active archaeal populations in the area could further our understanding of the ecological roles of archaea in the sediments and waters of the Qinhuangdao coastal aquaculture zone.

## Acknowledgments

We are indebted to Dr. Qinglin Wang (Hebei Normal University of Science and Technology) for assistance in sampling. We also thank Prof. Meng Li (Institute for Advanced Study, Shenzhen University) for assistance in data analysis.

## Author Contributions

**Conceptualization:** Shuping Wang, Zhenguang Yan.

**Data curation:** Shuping Wang, Xin Zheng, Juntao Fan, Pengyuan Wang.

**Funding acquisition:** Zhenguang Yan.

**Investigation:** Shuping Wang, Xin Zheng, Di Shi, Juntao Fan, Pengyuan Wang.

**Methodology:** Shuping Wang, Xin Zheng.

**Project administration:** Zhenguang Yan.

**Software:** Shuping Wang, Huijuan Xia, Juntao Fan.

**Validation:** Shuping Wang.

**Visualization:** Shuping Wang, Huijuan Xia.

**Writing – original draft:** Shuping Wang.

**Writing – review & editing:** Shuping Wang, Zhenguang Yan.

## References

1. Gao X, Zhou F, Chen CA. Pollution status of the Bohai Sea: an overview of the environmental quality assessment related trace metals. *Environ Int*. 2014; 62: 12–30. <https://doi.org/10.1016/j.envint.2013.09.019> PMID: 24161379
2. Liu Y, Cao X, Yu Z, Song X, Qiu L. Controlling harmful algae blooms using aluminum-modified clay. *Mar Pollut Bull*. 2016; 103: 211–219. <https://doi.org/10.1016/j.marpolbul.2015.12.017> PMID: 26763322
3. Ou L, Liu X, Li J, Qin X, Cui L, Lu S. Significant activities of extracellular enzymes from a brown tide in the coastal waters of Qinhuangdao, China. *Harmful Algae*. 2018; 74: 1–9. <https://doi.org/10.1016/j.hal.2018.03.005> PMID: 29724338
4. Cao X, Yu Z, Wu Z, Cheng F, He L, Yuan Y, et al. Environmental characteristics of annual pico/ nano-phytoplankton blooms along the Qinhuangdao Coast. *J Ocean Limnol*. 2018; 36: 281–292.
5. Stoeck T, Fruhe L, Forster D, Cordier T, Martins CIM, Pawlowski J. Environmental DNA metabarcoding of benthic bacterial communities indicates the benthic footprint of salmon aquaculture. *Mar Pollut Bull*. 2018; 127: 139–149. <https://doi.org/10.1016/j.marpolbul.2017.11.065> PMID: 29475645
6. Liu S, Lou S, Kuang C, Huang W, Chen W, Zhang J, et al. Water quality assessment by pollution-index method in the coastal waters of Hebei Province in western Bohai Sea, China. *Mar Pollut Bull*. 2011; 62: 2220–2229. <https://doi.org/10.1016/j.marpolbul.2011.06.021> PMID: 21802696
7. Li J, Li F, Yu S, Qin S, Wang G. Impacts of Mariculture on the Diversity of Bacterial Communities within Intertidal Sediments in the Northeast of China. *Microbial Ecol*. 2013; 66: 861–870.
8. He Y, Sen B, Zhou S, Xie N, Zhang Y, Zhang J, et al. Distinct Seasonal Patterns of Bacterioplankton Abundance and Dominance of Phyla  $\alpha$ -Proteobacteria and Cyanobacteria in Qinhuangdao Coastal Waters Off the Bohai Sea. *Front Microbiol*. 2017; 8: 1579. <https://doi.org/10.3389/fmicb.2017.01579> PMID: 28868051
9. Cui L, Lu X, Dong Y, Cen J, Cao R, Pan L, et al. Relationship between phytoplankton community succession and environmental parameters in Qinhuangdao coastal areas, China: A region with recurrent brown tide outbreaks. *Ecotox Environ Safe*. 2018; 159: 85–93.
10. Wang S, Zhang Y, He J, Jia X, Lin J, Li M, et al. Molecular analyses of bacterioplankton communities with highly abundant *Vibrio* clades: a case study in Bohai Sea coastal waters. *J Ocean Limnol*. 2019. <https://doi.org/10.1007/s00343-019-8210-1>
11. Parkes JR, Cragg BA, Wellsbury P. Recent studies on bacterial populations and processes in subsea-floor sediments: A review. *Hydrogeol J*. 2000; 10: 346.
12. Choi H, Koh HW, Kim H, Chae J, Park S. Microbial Community Composition in the Marine Sediments of Jeju Island: Next-Generation Sequencing Surveys. *J Microbiol Biotechnol*. 2016; 26: 883–890.
13. Lin X, Zhang L, Liu Y, Li Y. Bacterial and archaeal community structure of pan-Arctic Ocean sediments revealed by pyrosequencing. *Acta Oceanol Sin*. 2017; 36: 146–152.
14. Offre P, Spang A, Schleper C. Archaea in biogeochemical cycles. *Annu Rev Microbiol*. 2013; 67: 437–457. <https://doi.org/10.1146/annurev-micro-092412-155614> PMID: 23808334
15. Valentine DL. Biogeochemistry and microbial ecology of methane oxidation in anoxic environments: a review. *Anton Leeuw Int J G*. 2002; 81: 271–282.
16. Brochierarmant C, Boussau B, Gribaldo S, Forterre P. Mesophilic crenarchaeota: proposal for a third archaeal phylum, the Thaumarchaeota. *Nat Rev Microbiol*. 2008; 6: 245–252. <https://doi.org/10.1038/nrmicro1852> PMID: 18274537
17. Spang A, Hatzenpichler R, Brochierarmant C, Rattei T, Tischler P, Spieck E, et al. Distinct gene set in two different lineages of ammonia-oxidizing archaea supports the phylum Thaumarchaeota. *Trends Microbiol*. 2010; 18: 331–340. <https://doi.org/10.1016/j.tim.2010.06.003> PMID: 20598889
18. Berg C, Listmann L, Vandieken V, Vogts A, Jurgens K. Chemoautotrophic growth of ammonia-oxidizing Thaumarchaeota enriched from a pelagic redox gradient in the Baltic Sea. *Front Microbiol*. 2015; 5: 786. <https://doi.org/10.3389/fmicb.2014.00786> PMID: 25642221
19. Delong EF. Archaea in coastal marine environments. *P Natl Acad Sci USA*. 1992; 89: 5685–5689.
20. Kubo K, Lloyd KG, Biddle JF, Amann R, Teske A, Knittel K. Archaea of the Miscellaneous Crenarchaeotal Group are abundant, diverse and widespread in marine sediments. *ISME J*. 2012; 6: 1949–1965. <https://doi.org/10.1038/ismej.2012.37> PMID: 22551871
21. Vilacosta M, Barberan A, Auguet J, Sharma S, Moran MA, Casamayor EO. Bacterial and archaeal community structure in the surface microlayer of high mountain lakes examined under two atmospheric aerosol loading scenarios. *Fems Microbiol Ecol*. 2013; 84: 387–397. <https://doi.org/10.1111/1574-6941.12068> PMID: 23289422

22. Jorgensen SL, Hannisdal B, Lanzen A, Baumberger T, Flesland K, Fonseca RG, et al. Correlating microbial community profiles with geochemical data in highly stratified sediments from the Arctic Mid-Ocean Ridge. *P Natl Acad Sci USA*. 2012; 109: 16764–16765.
23. Karner M, Delong EF, Karl DM. Archaeal dominance in the mesopelagic zone of the Pacific Ocean. *Nature*. 2001; 409: 507–510. <https://doi.org/10.1038/35054051> PMID: 11206545
24. Lipp JS, Morono Y, Inagaki F, Hinrichs K. Significant contribution of Archaea to extant biomass in marine subsurface sediments. *Nature*. 2008; 454: 991–994. <https://doi.org/10.1038/nature07174> PMID: 18641632
25. Yang Y, Gao Y, Huang X, Ni P, Wu Y, Deng Y, et al. Adaptive shifts of bacterioplankton communities in response to nitrogen enrichment in a highly polluted river. *Environ Pollut*. 2019; 245: 290–299. <https://doi.org/10.1016/j.envpol.2018.11.002> PMID: 30445416
26. Coolen MJL, Hopmans EC, Rijpstra WIC, Muyzer G, Schouten S, Volkman JK, et al. Evolution of the methane cycle in Ace Lake (Antarctica) during the Holocene: response of methanogens and methanotrophs to environmental change. *Org Geochem*. 2004; 35: 1151–1167.
27. Zhou Z, Meng H, Liu Y, Gu J, Li M. Stratified Bacterial and Archaeal Community in Mangrove and Intertidal Wetland Mudflats Revealed by High Throughput 16S rRNA Gene Sequencing. *Front Microbiol*. 2017; 8:2148
28. Bokulich NA, Subramanian S, Faith JJ, Gevers D, Gordon JI, Knight R, et al. Quality-filtering vastly improves diversity estimates from Illumina amplicon sequencing. *Nat Methods*. 2013; 10: 57–59. <https://doi.org/10.1038/nmeth.2276> PMID: 23202435
29. Magoc T, Salzberg SL. FLASH: fast length adjustment of short reads to improve genome assemblies. *Bioinformatics*. 2011; 27: 2957–2963. <https://doi.org/10.1093/bioinformatics/btr507> PMID: 21903629
30. Edgar RC. Search and clustering orders of magnitude faster than BLAST. *Bioinformatics*. 2010; 26: 2460–2461. <https://doi.org/10.1093/bioinformatics/btq461> PMID: 20709691
31. Caporaso JG, Kuczynski J, Stombaugh J, Bittinger K, Bushman FD, Costello EK, et al. QIIME allows analysis of high-throughput community sequencing data. *Nat Methods*. 2010; 7: 335–336. <https://doi.org/10.1038/nmeth.f.303> PMID: 20383131
32. Pelin Y, Laura Wegener P, Pablo Y, Jan G, Elmar P, Christian Q, et al. The SILVA and "All-species Living Tree Project (LTP)" taxonomic frameworks. *Nucleic Acids Res*. 2014; 42: D643–648. <https://doi.org/10.1093/nar/gkt1209> PMID: 24293649
33. Thompson JD, Gibson TJ, Plewniak F, Jeanmougin F, Higgins DG. The CLUSTAL\_X windows interface: flexible strategies for multiple sequence alignment aided by quality analysis tools. *Nucleic Acids Res*. 1997; 25: 4876–4882. <https://doi.org/10.1093/nar/25.24.4876> PMID: 9396791
34. Tamura K, Stecher G, Peterson DS, Filipowski A, Kumar S. MEGA6: Molecular Evolutionary Genetics Analysis Version 6.0. *Mol Biol Evol*. 2013; 30: 2725–2729. <https://doi.org/10.1093/molbev/mst197> PMID: 24132122
35. Bhattacharyya A, Majumder NS, Basak P, Mukherji S, Roy D, Nag S, et al. Diversity and Distribution of Archaea in the Mangrove Sediment of Sundarbans. *Archaea*. 2015; 2015: 968582. <https://doi.org/10.1155/2015/968582> PMID: 26346219
36. Zhang Y, Lin X, Shi X, Lin L, Luo H, Li L, et al. Metatranscriptomic Signatures Associated With Phytoplankton Regime Shift From Diatom Dominance to a Dinoflagellate Bloom. *Front Microbiol*. 2019; 10:590. <https://doi.org/10.3389/fmicb.2019.00590> PMID: 30967855
37. Mincer TJ, Church MJ, Taylor LT, Preston CM, Karl DM, Delong EF. Quantitative distribution of presumptive archaeal and bacterial nitrifiers in Monterey Bay and the North Pacific Subtropical Gyre. *Environ Microbiol*. 2007; 9: 1162–1175. <https://doi.org/10.1111/j.1462-2920.2007.01239.x> PMID: 17472632
38. Cao H, Li M, Hong Y, Gu J. Diversity and abundance of ammonia-oxidizing archaea and bacteria in polluted mangrove sediment. *Syst Appl Microbiol*. 2011; 34: 513–523. <https://doi.org/10.1016/j.syapm.2010.11.023> PMID: 21665398
39. Urakawa H, Martens-Habbena W, Stahl D. High Abundance of Ammonia-Oxidizing Archaea in Coastal Waters, Determined Using a Modified DNA Extraction Method. *Appl Environ Microb*. 2010; 76: 2129–2135.
40. Bernhard AE, Landry ZC, Blevins A, La Torre JRD, Giblin AE, Stahl DA. Abundance of Ammonia-Oxidizing Archaea and Bacteria along an Estuarine Salinity Gradient in Relation to Potential Nitrification Rates. *Appl Environ Microb*. 2010; 76: 1285–1289.
41. Li M, Hong YG, Cao HL, Gu JD. Mangrove trees affect the community structure and distribution of anaerobic bacteria at an anthropogenic-polluted mangrove in the Pearl River Delta reflected by 16S rRNA and hydrazine oxidoreductase (HZO) encoding gene analyses. *Ecotox Environ Safe*. 2011; 20: 1780–1790.

42. Cao H, Auguet J, Gu J. Global Ecological Pattern of Ammonia-Oxidizing Archaea. *PLOS ONE*. 2013; 8: e52853. <https://doi.org/10.1371/journal.pone.0052853> PMID: 23468838
43. Knittel K, Boetius A. Anaerobic Oxidation of Methane: Progress with an Unknown Process. *Annu Rev Microbiol*. 2009; 63: 311–334. <https://doi.org/10.1146/annurev.micro.61.080706.093130> PMID: 19575572
44. Milucka J, Ferdelman TG, Polerecky L, Franzke D, Wegener G, Schmid M, et al. Zero-valent sulphur is a key intermediate in marine methane oxidation. *Nature*. 2012; 491: 541–546. <https://doi.org/10.1038/nature11656> PMID: 23135396
45. Zhang Y, Zhao Z, Chen CA, Tang K, Su J, Jiao N. Sulfur Metabolizing Microbes Dominate Microbial Communities in Andesite-Hosted Shallow-Sea Hydrothermal Systems. *PLOS ONE*. 2012; 7: e44593. <https://doi.org/10.1371/journal.pone.0044593> PMID: 22970260
46. Wuchter C, Abbas B, Coolen MJL, Herfort L, Bleijswijk JV, Timmers P, et al. Archaeal Nitrification in the Ocean. *P Natl Acad Sci USA*. 2006; 103: 12317–12322.
47. Prosser JI, Nicol GW. Relative contributions of archaea and bacteria to aerobic ammonia oxidation in the environment. *Environ Microbiol*. 2008; 10: 2931–2941. <https://doi.org/10.1111/j.1462-2920.2008.01775.x> PMID: 18973620
48. Jung M, Park S, Kim S, Kim J, Damste JSS, Jeon CO, et al. A Mesophilic, Autotrophic, Ammonia-Oxidizing Archaeon of Thaumarchaeal Group I.1a Cultivated from a Deep Oligotrophic Soil Horizon. *Appl Environ Microb*. 2014; 80: 3645–3655.
49. Wang X, Cui W, Bao L, Xie S. Abundance and community structure of ammonia-oxidizing microorganisms in reservoir sediment and adjacent soils. *Appl Microbiol Biotechnol*. 2014; 98: 1883–1892. <https://doi.org/10.1007/s00253-013-5174-5> PMID: 23949998
50. Gordon W, O'Sullivan LA, Yiyu M, Williams AS, Sass AM, Watkins AJ, et al. Archaeal community diversity and abundance changes along a natural salinity gradient in estuarine sediments. *Fems Microbiol Ecol*. 2015; 91: 1–18.
51. Coci M, Odermatt N, Salcher MM, Pernthaler J, Corno G. Ecology and Distribution of Thaumarchaea in the Deep Hypolimnion of Lake Maggiore. *Archaea*. 2015; 2015: 590434. <https://doi.org/10.1155/2015/590434> PMID: 26379473
52. Bayer B, Vojvoda J, Offre P, Alves RJE, Elisabeth NH, Garcia JAL, et al. Physiological and genomic characterization of two novel marine thaumarchaeal strains indicates niche differentiation. *ISME J*. 2016; 10: 1051–1063. <https://doi.org/10.1038/ismej.2015.200> PMID: 26528837
53. Keuter S, Rinkevich B. Spatial homogeneity of bacterial and archaeal communities in the deep eastern Mediterranean Sea surface sediments. *Int Microbiol*. 2016; 19: 109–119. <https://doi.org/10.2436/20.1501.01.269> PMID: 27845498
54. Wemheuer F, von Hoyningen-Huene AJE, Pohlner M, Degenhardt J, Engelen B, Daniel R, et al. Primary Production in the Water Column as Major Structuring Element of the Biogeographical Distribution and Function of Archaea in Deep-Sea Sediments of the Central Pacific Ocean. *Archaea*. 2019; 2019: 12.
55. Castelle CJ, Wrighton KC, Thomas BC, Hug LA, Brown CT, Wilkins MJ, et al. Genomic Expansion of Domain Archaea Highlights Roles for Organisms from New Phyla in Anaerobic Carbon Cycling. *Curr Biol*. 2015; 25: 690–701. <https://doi.org/10.1016/j.cub.2015.01.014> PMID: 25702576
56. Spang A, Caceres EF, Ettema TJG. Genomic exploration of the diversity, ecology, and evolution of the archaeal domain of life. *Science*. 2017; 357
57. Youssef NH, Rinke C, Stepanauskas R, Farag I, Woyke T, Elshahed MS. Insights into the metabolism, lifestyle and putative evolutionary history of the novel archaeal phylum 'Diapherotrites'. *ISME J*. 2015; 9: 447–460. <https://doi.org/10.1038/ismej.2014.141> PMID: 25083931
58. Eme L, Doolittle WF. Microbial Diversity: A Bonanza of Phyla. *Curr Biol*. 2015; 25:690–701. <https://doi.org/10.1016/j.cub.2015.01.014>
59. Priscu JC, Fritsen CH, Adams EE, Giovannoni SJ, Paerl HW, McKay CP, et al. Perennial Antarctic lake ice: an oasis for life in a polar desert. *Science*. 1998; 280: 2095–2098. PMID: 9641910
60. Nam Y, Sung Y, Chang H, Roh SW, Kim K, Rhee S, et al. Characterization of the depth-related changes in the microbial communities in Lake Hovsgol sediment by 16S rRNA gene-based approaches. *J Microbiol*. 2008; 46: 125–136. <https://doi.org/10.1007/s12275-007-0189-1> PMID: 18545961
61. Billard E, Domaizon I, Tissot N, Arnaud F, Lyautey E. Multi-scale phylogenetic heterogeneity of archaea, bacteria, methanogens and methanotrophs in lake sediments. *Hydrobiologia*. 2015; 751: 159–173.
62. Smith RJ, Jeffries TC, Roudnew B, Fitch AJ, Seymour JR, Delpin MW, et al. Metagenomic comparison of microbial communities inhabiting confined and unconfined aquifer ecosystems. *Environ Microbiol*. 2012; 14: 240–253. <https://doi.org/10.1111/j.1462-2920.2011.02614.x> PMID: 22004107

63. Gibtan A, Park K, Woo M, Shin J, Lee D, Sohn JH, et al. Diversity of Extremely Halophilic Archaeal and Bacterial Communities from Commercial Salts. *Front Microbiol.* 2017; 8: 631. <https://doi.org/10.3389/fmicb.2017.00631>
64. Kopke B, Wilms R, Engelen B, Cypionka H, Sass H. Microbial Diversity in Coastal Subsurface Sediments: a Cultivation Approach Using Various Electron Acceptors and Substrate Gradients. *Appl Environ Microb.* 2005; 71: 7819–7830.
65. Zhang CL, Xie W, Martincubadrado A, Rodriguezvalera F. Marine Group II Archaea, potentially important players in the global ocean carbon cycle. *Front Microbiol.* 2015; 6: 1108. <https://doi.org/10.3389/fmicb.2015.01108> PMID: 26528260
66. Xie W, Luo H, Murugapiran SK, Dodsworth JA, Chen S, Sun Y, et al. Localized high abundance of Marine Group II archaea in the subtropical Pearl River Estuary: implications for their niche adaptation. *Environ Microbiol.* 2018; 20: 734–754. <https://doi.org/10.1111/1462-2920.14004> PMID: 29235710
67. Liu X, Pan J, Liu Y, Li M, Gu J. Diversity and distribution of Archaea in global estuarine ecosystems. *Sci Total Environ.* 2018: 349–358.
68. Gifford SM, Sharma S, Moran MA. Linking activity and function to ecosystem dynamics in a coastal bacterioplankton community. *Front Microbiol.* 2014; 5: 185. <https://doi.org/10.3389/fmicb.2014.00185> PMID: 24795712
69. Gomezpereira PR, Fuchs BM, Alonso C, Oliver MJ, Van Beusekom J, Amann R. Distinct flavobacterial communities in contrasting water masses of the North Atlantic Ocean. *ISME J.* 2010; 4: 472–487. <https://doi.org/10.1038/ismej.2009.142> PMID: 20054356
70. Zhang J, Yang Y, Zhao L, Li YP, Xie S, Liu Y. Distribution of sediment bacterial and archaeal communities in plateau freshwater lakes. *Appl Microbiol Biol.* 2015; 99: 3291–3302.
71. Konneke M, Bernhard AE, La Torre JRD, Walker CB, Waterbury JB, Stahl DA. Isolation of an autotrophic ammonia-oxidizing marine archaeon. *Nature.* 2005; 437: 543–546. <https://doi.org/10.1038/nature03911> PMID: 16177789
72. Groussin M, Gouy M. Adaptation to Environmental Temperature Is a Major Determinant of Molecular Evolutionary Rates in Archaea. *Mol Biol Evol.* 2011; 28: 2661–2674. <https://doi.org/10.1093/molbev/msr098> PMID: 21498602
